# Supplementary material for: Panax quinquefolius saponin inhibits vascular smooth muscle cell calcification via activation of nuclear factor-erythroid 2-related factor 2
Source: BMC Complement Med Ther. 2023 Apr 21;23:129. doi: 10.1186/s12906-023-03961-6 (PMC10120105; doi:10.1186/s12906-023-03961-6)
Supplement: Supplementary file 4 — Additional file 4. [file 12906_2023_3961_MOESM4_ESM.xlsx]

## Sheet: Fig4A ROS
ROS levels were determined as the mean fluorescence intensity
	fluorescence intensity
Exp1	1	2	3	Ave
Blank	164.22	173.31	112.75	150.093	1
Pi	644.84	799.2	951.49	798.51	5.32009
Pi+PQS25	753.71	668.32	595.26	672.43	4.48008
Pi+PQS50	253.71	368.32	287.55	303.193	2.02003
Pi+PQS100	163.78	147.06	161.95	157.597	1.04999
	fluorescence intensity
Exp2	1	2	3	Ave
Blank	180.78	182.8	181.25	181.61	1.20998
Pi	1027.06	881.01	888.16	932.077	6.20998
Pi+PQS25	801.54	877.29	748.17	809	5.38998
Pi+PQS50	473.08	454.2	414.55	447.277	2.97999
Pi+PQS100	376.48	303.89	206.68	295.683	1.97
	fluorescence intensity
Exp2	1	2	3	Ave
Blank	123.78	142.8	152.18	139.587	0.929999
Pi	827.06	811.01	766.42	801.497	5.33999
Pi+PQS25	801.54	877.29	752.68	810.503	5.4
Pi+PQS50	573.08	654.2	416.24	547.84	3.65
Pi+PQS100	176.48	193.89	187.97	186.113	1.23998

## Sheet: Fig4B Nrf2 Trans 
Nrf2 transcriptional reporter assay
	firefly luciferase	Renilla luciferase	m1/m2
Blank-1	25045	14308	1.75042
	32633	19282	1.69241
	24683	20956	1.17785
Ave	27453.7	18182	1.54023
Blank-2	26376	17758	1.4853
	25302	18239	1.38725
	25072	22777	1.10076
Ave	25583.3	19591.3	1.32444
Blank-3	30964	24289	1.27482
	30258	22308	1.35637
	23780	21993	1.08125
Ave	28334	22863.3	1.23748
Pi-1	23262	30439	0.764217
	20762	28787	0.721228
	21465	34659	0.61932
Ave	21829.7	31295	0.701588
Pi-2	14636	11351	1.2894
	11657	13416	0.868888
	9751	12457	0.782773
Ave	12014.7	12408	0.980354
Pi-3	19091	21257	0.898104
	13858	27995	0.495017
	11409	22782	0.50079
Ave	14786	24011.3	0.631304
Pi+PQS25-1	39131	29632	1.32057
	27978	22934	1.21994
	28654	16283	1.75975
Ave	31921	22949.7	1.43342
Pi+PQS25-2	30304	15526	1.95182
	30682	18682	1.64233
	29684	17708	1.6763
Ave	30223.3	17305.3	1.75682
Pi+PQS25-3	35595	17268	2.06133
	32742	15724	2.08229
	42603	18521	2.30025
Ave	36980	17171	2.14796
Pi+PQS50-1	57393	17304	3.31675
	64541	16470	3.9187
	56214	16035	3.50571
Ave	59382.7	16603	3.58038
Pi+PQS50-2	46672	16584	2.81428
	57104	26526	2.15276
	57682	18682	3.08757
Ave	53819.3	20597.3	2.68487
Pi+PQS50-3	65595	19268	3.40435
	52342	13624	3.8419
	61603	28821	2.13743
Ave	59846.7	20571	3.12789
Pi+PQS100-1	118131	29632	3.9866
	163078	22934	7.11075
	147440	19601	7.52207
Ave	142883	24055.7	6.20647
Pi+PQS100-2	126684	17708	7.15405
	134142	22176	6.04897
	116371	13978	8.3253
Ave	125732	17954	7.17611
Pi+PQS100-3	211336	23376	9.04073
	198818	26262	7.57056
	140242	22176	6.32404
Ave	183465	23938	7.64511
	Blank	Pi	25	50	100
1	1.54023	0.701588	1.43342	3.58038	6.20647
2	1.32444	0.980354	1.75682	2.68487	7.17611
3	1.23748	0.631304	2.14796	3.12789	7.64511

## Sheet: Fig4C PCR
The expression of Nrf2 and HO-1 was determined using RT‑PCR analysis.
EXP1		Ct1	Ct2	Ct3	mean Ct	Δct	ΔΔct	2-ΔΔct			EXP1		Ct1	Ct2	Ct3	mean Ct	Δct	ΔΔct	2-ΔΔct
Blank	b-actin	15.57	15.55	15.39	15.5033						Blank	b-actin	15.57	15.55	15.39	15.5033
	Nrf2	18.76	19.21	18.86	18.9433	3.44	0	1				HO-1	21.84	21.47	21.88	21.73	6.22667	0	1
Pi	b-actin	15.61	15.55	15.08	15.4133						Pi	b-actin	15.61	15.55	15.08	15.4133
	Nrf2	19.59	19.58	20.22	19.7967	4.38333	0.943333	0.52003				HO-1	22.91	22.38	23.28	22.8567	7.44333	1.21667	0.430276
Pi+PQS	b-actin	15.35	15.58	15.1	15.3433						Pi+PQS	b-actin	15.35	15.58	15.1	15.3433
	Nrf2	17.84	17.21	17.64	17.5633	2.22	-1.22	2.32947				HO-1	21.11	20.18	19.49	20.26	4.91667	-1.31	2.47942
EXP2		Ct1	Ct2	Ct3	mean Ct	Δct	ΔΔct	2-ΔΔct			EXP2		Ct1	Ct2	Ct3	mean Ct	Δct	ΔΔct	2-ΔΔct
Blank	b-actin	18.04	18.56	17.1	17.9						Blank	b-actin	18.04	18.56	17.1	17.9
	Nrf2	20.15	20.57	20.58	20.4333	2.53333	0	1				HO-1	19.46	19.38	18.35	19.0633	1.16333	0	1
Pi	b-actin	19.49	19.27	19.6	19.4533						Pi	b-actin	19.49	19.27	19.6	19.4533
	Nrf2	23.14	23.81	22.19	23.0467	3.59333	1.06	0.479632				HO-1	21.21	21.34	21.16	21.2367	1.78333	0.62	0.650671
Pi+PQS	b-actin	18.61	17.35	18.04	18						Pi+PQS	b-actin	18.61	17.35	18.04	18
	Nrf2	19.34	18.99	18.8	19.0433	1.04333	-1.49	2.80889				HO-1	17.64	17.25	17.61	17.5	-0.5	-1.66333	3.16748
EXP3		Ct1	Ct2	Ct3	mean Ct	Δct	ΔΔct	2-ΔΔct			EXP3		Ct1	Ct2	Ct3	mean Ct	Δct	ΔΔct	2-ΔΔct
Blank	b-actin	21.94	21.3	21.56	21.6						Blank	b-actin	21.94	21.3	21.56	21.6
	Nrf2	19.46	19.82	19.72	19.6667	-1.93333	0	1				HO-1	23.56	23.81	24.12	23.83	2.23	0	1
Pi	b-actin	20.62	21.02	19.99	20.5433						Pi	b-actin	20.62	21.02	19.99	20.5433
	Nrf2	19.81	20.49	18.04	19.4467	-1.09667	0.836667	0.559936				HO-1	23.31	23.46	24.55	23.7733	3.23	1	0.5
Pi+PQS	b-actin	21.62	21.71	21	21.4433						Pi+PQS	b-actin	21.62	21.71	21	21.4433
	Nrf2	17.89	18.04	18.11	18.0133	-3.43	-1.49667	2.8219				HO-1	22.71	21.89	21.41	22.0033	0.56	-1.67	3.18215
	Blank	Pi	Pi+PQS								Blank	Pi	Pi+PQS
	1	0.52003	2.32947								1	0.430276	2.47942
	1	0.479632	2.80889								1	0.650671	3.16748
	1	0.559936	2.8219								1	0.5	3.18215

## Sheet: Fig4D WB
The expression of Nrf2 and HO-1 was determined using Western blot analysis.
		blot1	blot2	blot3	blot4					ave	std		blank	Pi	Pi+PQS
Fig3D Nrf2	blank	299123	77518	44968	8758		1.21745	1.35939	1.19351	1.25679	0.0732091	1	1.21745	0.417871	3.67081
	Pi	102971	30828	16064	4992		0.417871	0.556362	0.507055	0.493763	0.0573144	2	1.35939	0.556362	5.72833
	Pi+PQS	658459	301350	173167	33669		3.67081	5.72833	5.12844	4.84253	0.863965	3	1.19351	0.507055	5.12844
		blot1	blot2	blot3	blot4
Fig3D HO-1	blank	240818	63373	62508	75111		0.980146	1.11134	1.65905	1.25018	0.294035	1	0.980146	0.479344	3.33701
	Pi	118119	25858	16021	41102		0.479344	0.466667	0.505697	0.483903	0.016257	2	1.11134	0.466667	3.87378
	Pi+PQS	598582	203788	124699	155964		3.33701	3.87378	3.69303	3.63461	0.222998	3	1.65905	0.505697	3.69303
		blot1	blot2	blot3
Fig3D β-actin	blank	245696	57024	37677
	Pi	246418	55410	31681
	Pi+PQS	179377	52607	33766

## Sheet: Fig4E WB
The expression of Runx2, SM22α and Nrf2 was determined using Western blot analysis.
		blot1	blot2	blot3						ave	std
Fig3E Nrf2	blank	53189	57102	26015			0.433252	0.516765	0.544783	0.498266	0.0473739
	Pi	14053	24943	10965			0.117918	0.258391	0.215681	0.19733	0.0587976
	Pi+PQS	280260	267494	141969			2.3644	2.4787	3.031	2.6247	0.291061
	Pi+PQS+siNrf2	26319	26490	13712			0.183605	0.220386	0.235516	0.213169	0.0217987
	Pi+PQS+conNrf2	226250	311135	158425			1.79367	2.37531	2.5483	2.23909	0.322781
		blot1	blot2	blot3
Fig3E Runx2	blank	0	0	0			0	0	0	0	0
	Pi	513513	452848	192914			4.30886	4.69117	3.79461	4.26488	0.367339
	Pi+PQS	194901	194115	70844			1.64428	1.79874	1.5125	1.65184	0.116981
	Pi+PQS+siNrf2	963563	902248	460338			6.72194	7.50635	7.90673	7.37834	0.492087
	Pi+PQS+conNrf2	189014	220304	82274			1.49847	1.68188	1.32339	1.50125	0.146364
		blot1	blot2	blot3
Fig3E β-actin	blank	122767	110499	47753
	Pi	119176	96532	50839
	Pi+PQS	118533	107917	46839
	Pi+PQS+siNrf2	143346	120198	58221
	Pi+PQS+conNrf2	126138	130987	62169

## Sheet: Fig4F Staining
Quantification of calcium deposition using ALP activity assay
Alizarin red/OD units
	Blank	Pi	Pi+PQS	Pi+PQS+si-Nrf2	Pi+PQS+si-Con
1	0.1923	0.7802	0.1351	0.6257	0.1529
	0.025	0.3525	0.1555	0.7755	0.2042
	0.0306	0.427	0.171	0.767	0.3032
Average	0.0826333	0.5199	0.153867	0.722733	0.2201
2	0.0511	0.6326	0.1922	0.4471	0.1893
	0.0485	0.5525	0.1711	0.543	0.1625
	0.0324	0.462	0.1972	0.656	0.1735
Average	0.044	0.549033	0.186833	0.5487	0.1751
3	0.212	0.0294	0.1662	0.5244	0.2434
	0.0415	0.799	0.1665	0.6085	0.2105
	0.0332	0.575	0.186	0.778	0.2165
Average	0.0955667	0.4678	0.1729	0.636967	0.223467
