# Supplementary material for: Panax quinquefolius saponin inhibits vascular smooth muscle cell calcification via activation of nuclear factor-erythroid 2-related factor 2
Source: BMC Complement Med Ther. 2023 Apr 21;23:129. doi: 10.1186/s12906-023-03961-6 (PMC10120105; doi:10.1186/s12906-023-03961-6)
Supplement: Supplementary file 5 — Additional file 5. [file 12906_2023_3961_MOESM5_ESM.xlsx]

## Sheet: Fig5A WB
		blot1	blot2	blot3					Ave	Std
Fig4A Keap1	Blank	132429	136958	71911		0.826741	1.15177	1.20355	1.06069	0.16677
	Pi	176942	120816	96660		1.12734	1.22757	1.2087	1.18787	0.0434911
	Pi+PQS	104329	109868	84273		0.887665	0.902577	0.960267	0.916836	0.0313076
		blot1	blot1-2	blot2
Fig4A β-actin	Blank	160182	118911	59749
	Pi	156956	98419	79970
	Pi+PQS	117532	121727	87760

## Sheet: Fig5B WB
		blot1	blot2	blot3					Ave	Std
Fig4B Keap1	Ctrl	210995	148496	158307		2.33735	1.85992	1.63583	1.94437	0.292555
	si-Ctrl	193566	143830	120746		1.76052	1.90718	1.11543	1.59438	0.343921
	si-keap1	21196	24477	18175		0.191668	0.224956	0.17388	0.196835	0.0211692
		blot1	blot2	blot3
Fig4B Nrf2	Ctrl	53229	54077	55884		0.589658	0.677317	0.577463	0.614813	0.0444768
	si-Ctrl	66876	60038	75085		0.608251	0.796102	0.693619	0.699324	0.0767956
	si-keap1	164307	170516	133951		1.48577	1.56713	1.28151	1.4448	0.120148
		blot1	blot2	blot3
Fig4B Runx2	Ctrl	54327	50739	69699		0.601821	0.635509	0.720217	0.652516	0.0498084
	si-Ctrl	84920	50372	69429		0.772365	0.667931	0.641371	0.693889	0.0565406
		12285	13069	16997		0.111089	0.120111	0.16261	0.13127	0.0224649
	si-keap1
		blot1	blot2	blot3
Fig4B β-actin	Ctrl	90271	79840	96775
	si-Ctrl	109948	75415	108251
	si-keap1	110587	108808	104526
